# Supplementary material for: Bottom-up synthesis of titanate nanoflakes and nanosheets in ionic liquid solvents
Source: Royal Society of Chemistry journal article supplement (doi:10.1039/c6ce01543c), 2016-01-01
Supplement: c6ce01543c1.pdf [file c6ce01543c1.pdf]

## *Electronic Supplementary Information*

# **Bottom-up synthesis of titanate nanoflakes and nanosheets in ionic liquid solvents**

*Takayuki BAN\*, Yasuhiko KONDO, and Yutaka OHYA*

Department of Chemistry and Biomolecular Science, Gifu University, Yanagido 1-1, Gifu 501-1193, JAPAN

E-mail: ban@gifu-u.ac.jp

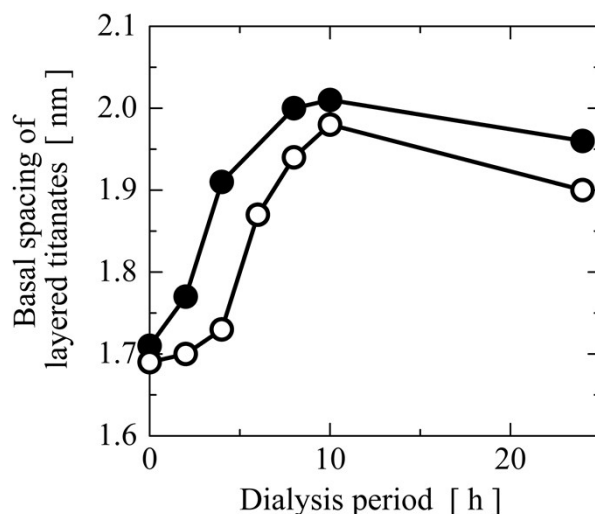

**Figure S1** Change of the basal spacing of the layered titanates synthesized in TBACl ionic liquid solvent (open circle) and water solvent (closed circle) with dialysis period.

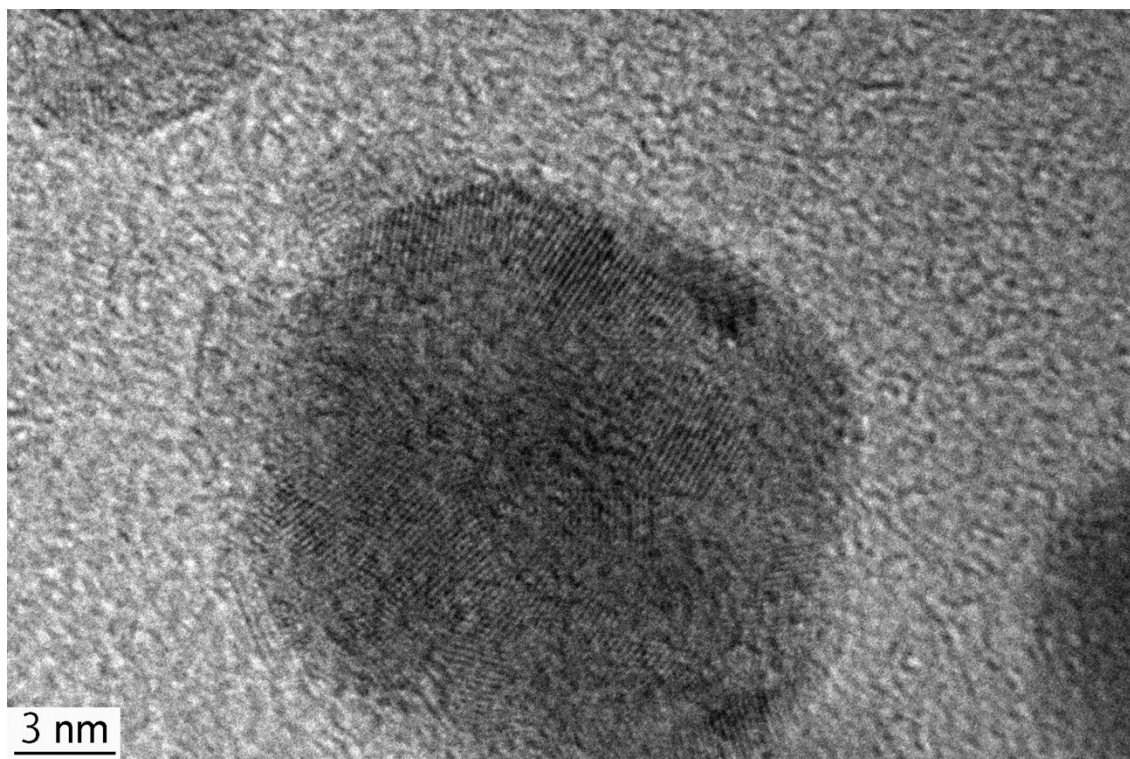

**Figure S2** TEM images of the aggregates of the titanate nanoflakes synthesized in TBACl solvent.

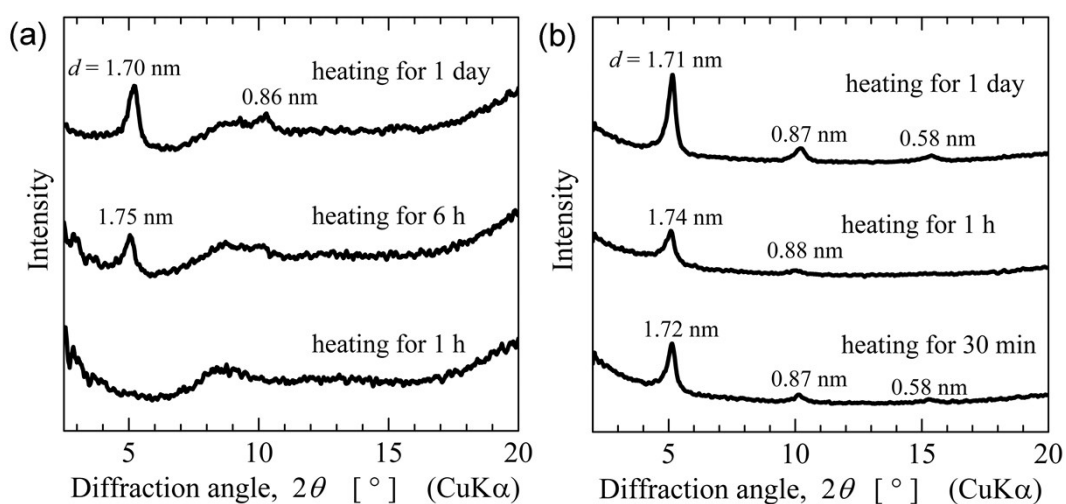

**Figure S3** XRD patterns of the sols prepared by heating reaction mixtures containing TBACl solvent for different periods. The reaction mixtures were prepared using (a) Ti complexes and (b) TIP as a Ti source.

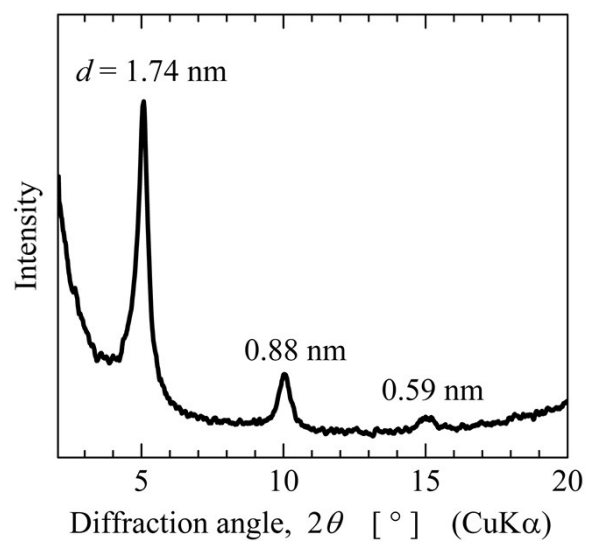

**Figure S4** XRD pattern of the layered titanate synthesized using Ti complexes as a Ti source in TBACl solvent. The sample was prepared by dialyzing the obtained sol and then evaporating the dialyzed sol on a glass substrate.
